# Supplementary material
Source: PubMed Central journal article supplement (PMC2531255)
Supplement: NIHMS62400-supplement-si20070404_105.pdf [file NIHMS62400-supplement-si20070404_105.pdf]

Probing Ligand Binding to Duplex DNA using  $\text{KMnO}_4$  Reactions and Electrospray  
Ionization Tandem Mass spectrometry

*Carolyn L. Mazzitelli and Jennifer S. Brodbelt*

Department of Chemistry and Biochemistry, 1 University Station A5300, University of Texas at  
Austin, Austin, TX 78751

**Supporting Information Section Table of Contents:**

Figure S-1. ESI-mass spectra of d(GCAGTGA/TCACTGC) before the  $\text{KMnO}_4$  reaction and with echinomycin after the  $\text{KMnO}_4$  reaction: Page S-2.

Figure S-2. ESI-mass spectra of d(GGACAGTGAGGGCAGTGAGGG/CCTGTCCTCCCGTCACTCCC) before the  $\text{KMnO}_4$  reaction and with echinomycin after the  $\text{KMnO}_4$  reaction: Page S-3.

Figure S-3. ESI-mass spectra of d(GCGGGGATGGGGCG/CGCCCCATCCCCGC) before the  $\text{KMnO}_4$  reaction and with actinomycin-D after the  $\text{KMnO}_4$  reaction: Page S-4

Figure S-4. ESI-mass spectra of d(GTAGAGTCGACCTG/CAGGTCGACTCTAC) with ethidium bromide before and after the  $\text{KMnO}_4$  reaction: Page S-5.

Figure S-5. ESI-MS<sup>3</sup> spectra for  $[\text{ds} + \text{E} + \text{O}]^{6-}$  containing d(GCGGATATATGGCG/CGCCATATATCCGC) and echinomycin: Page S-6.

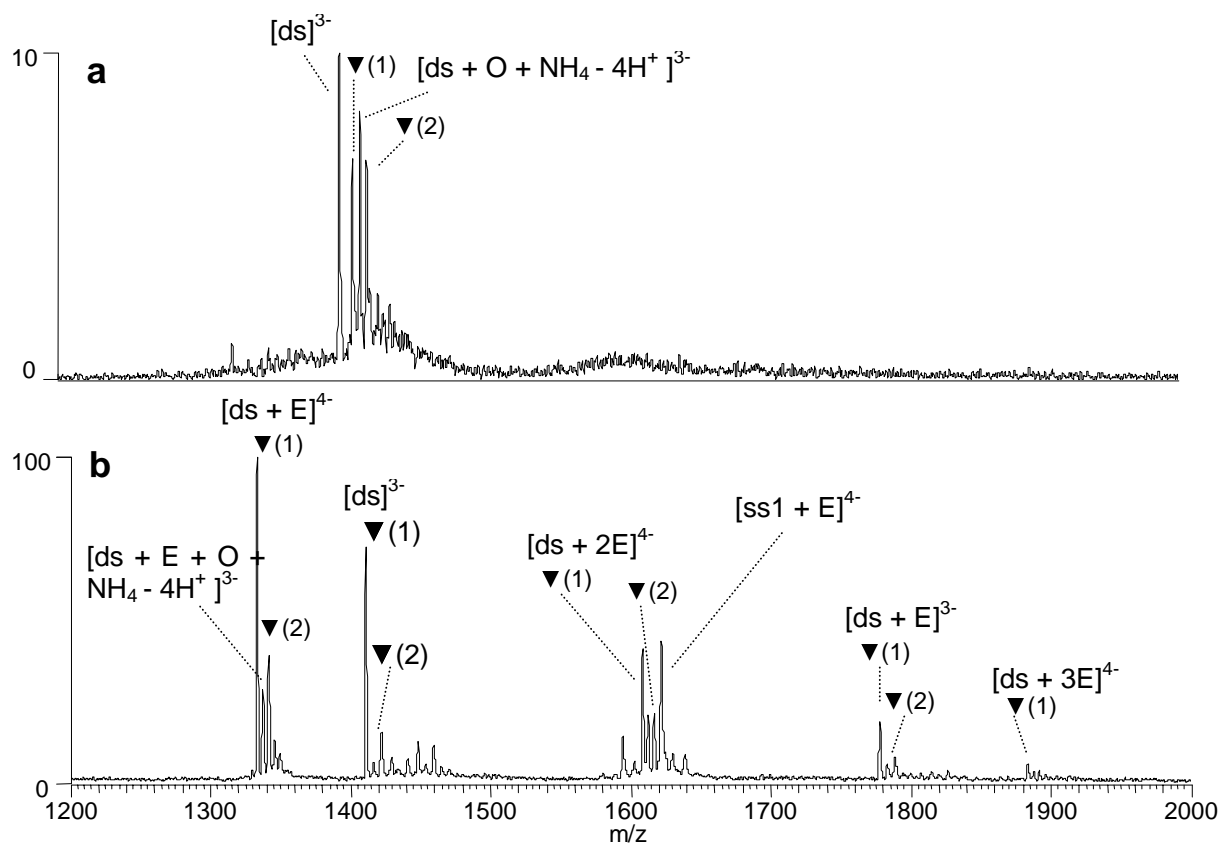

**Figure S-1.** ESI-mass spectra showing solutions containing the duplex d(GCAGTGA/TCACTGC) (a) after 20 min, reaction with  $\text{KMnO}_4$ , and (b) with echinomycin (E), after 20 min. reaction with  $\text{KMnO}_4$ . Ions containing oxidized thymines are labeled with ▼, with the number in parenthesis indicating the number of oxidation adducts.

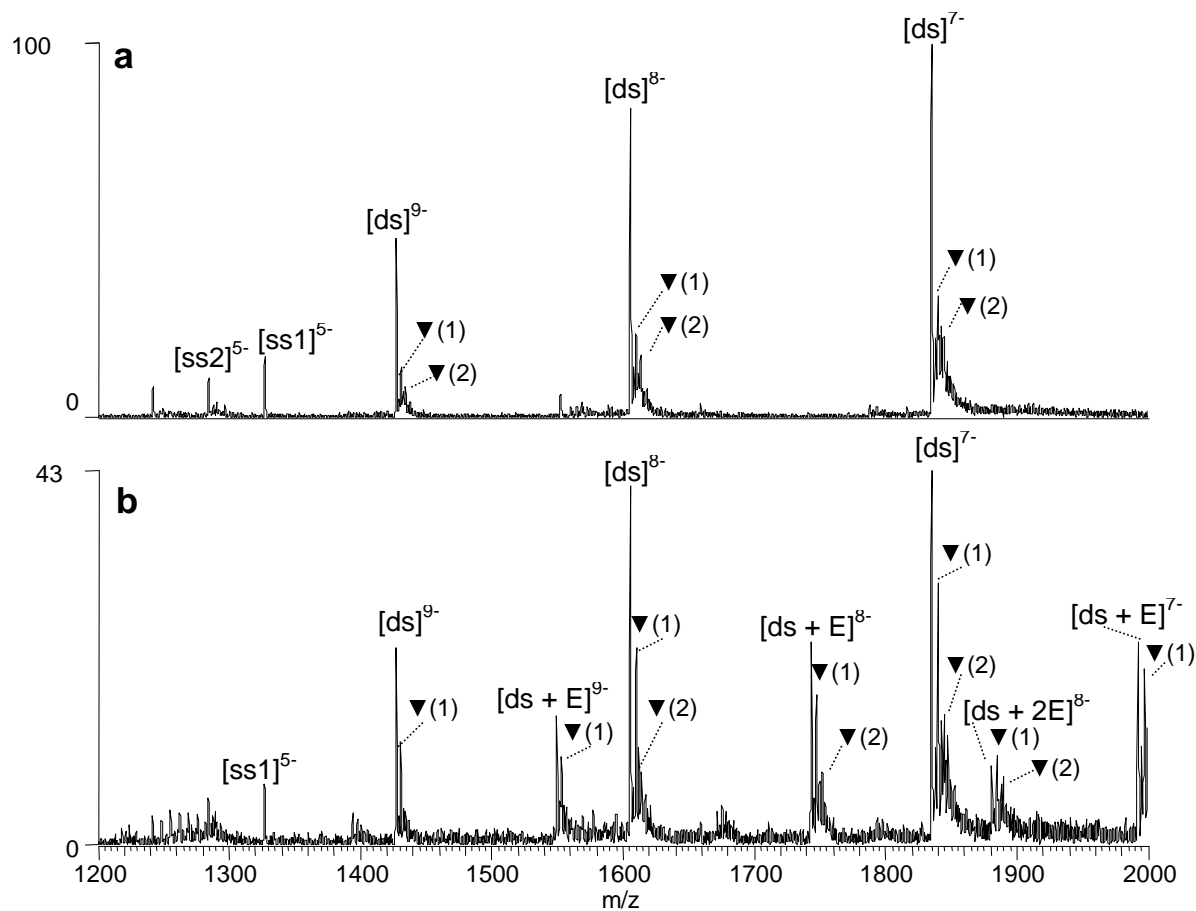

**Figure S-2.** ESI-mass spectra showing solutions containing the duplex d(GGACAGTGAGGGCAGTGAGGG/CCTGTCACTCCCGTCACTCCC) (a) after 20 min, reaction with  $\text{KMnO}_4$ , and (b) with echinomycin (E), after 20 min. reaction with  $\text{KMnO}_4$ . Ions containing oxidized thymines are labeled with ▼, with the number in parenthesis indicating the number of oxidation adducts.

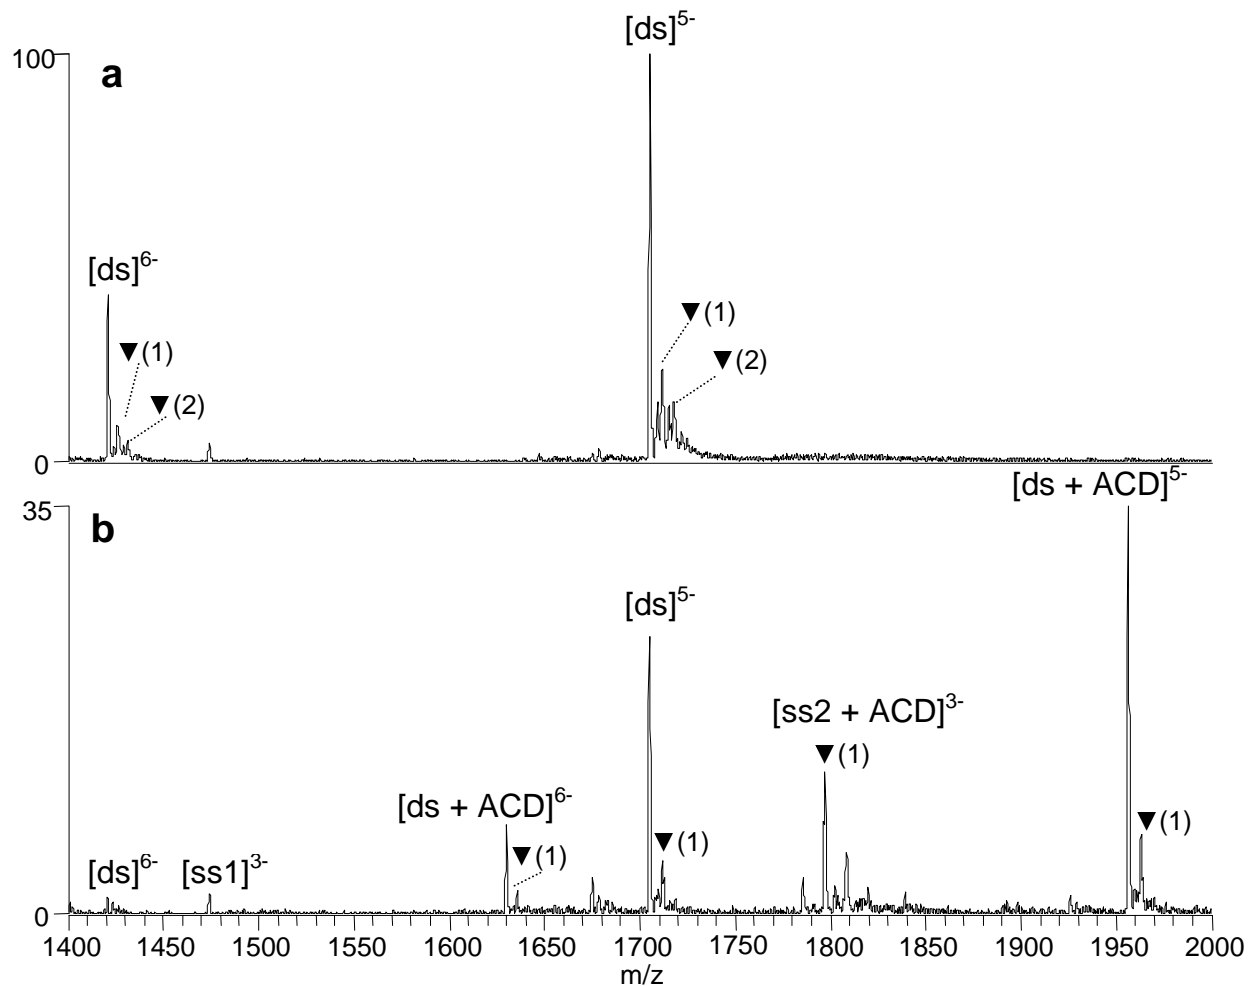

**Figure S-3.** ESI-mass spectra showing solutions containing the duplex d(GCGGGGATGGGGCG/CGCCCCATCCCCGC) (a) after 20 min, reaction with  $KMnO_4$ , and (b) with actinomycin-D (ACD), after 20 min. reaction with  $KMnO_4$ . Ions containing oxidized thymines are labeled with  $\blacktriangledown$ , with the number in parenthesis indicating the number of oxidation adducts. The single strand d(GCGGGGATGGGGCG) is abbreviated as ss1 and d(CGCCCCATCCCCGC) is ss2.

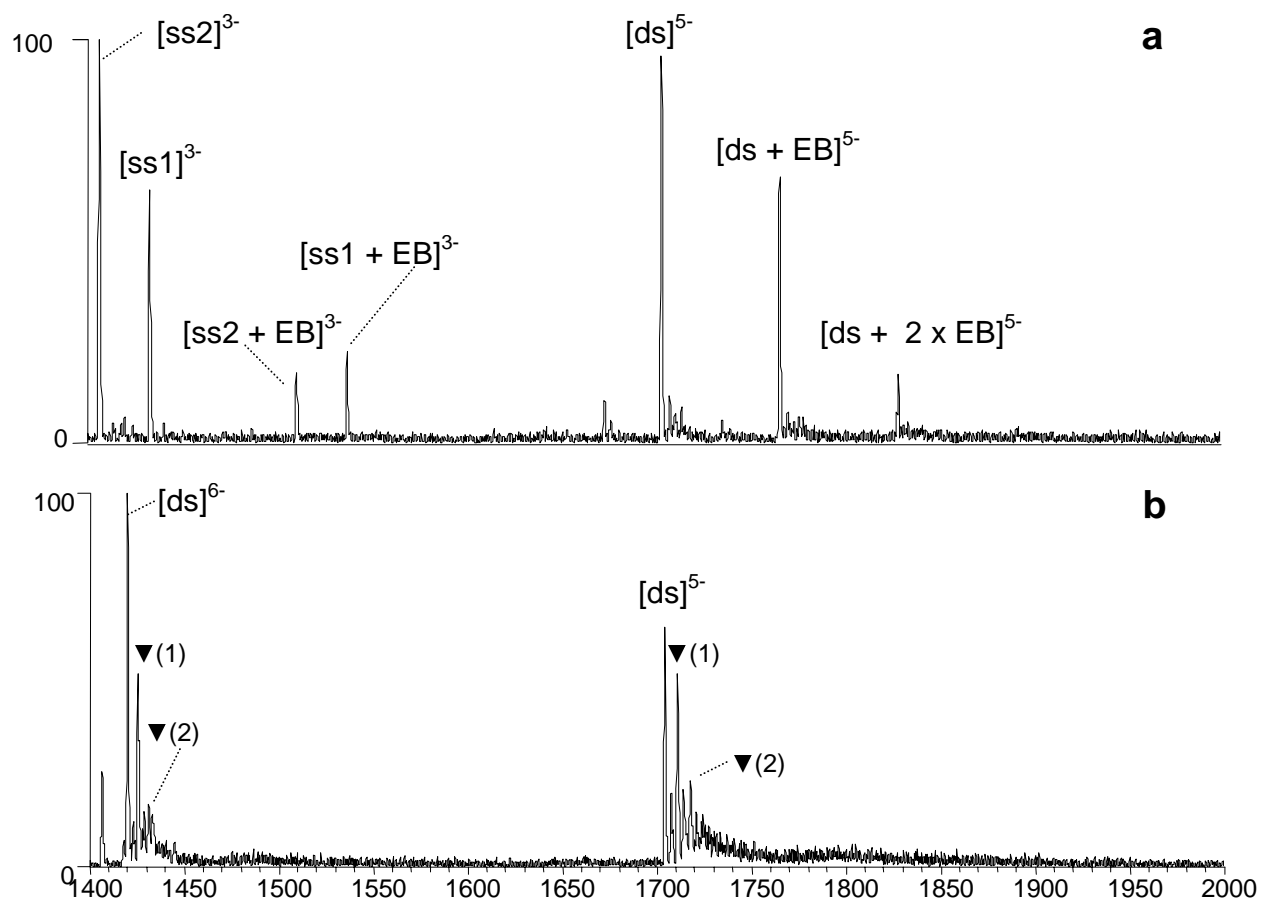

**Figure S-4.** ESI-mass spectra showing solutions containing the duplex d(GTAGAGTCGACCTG/CAGGTCGACTCTAC) (a) with ethidium bromide (EB) prior to the  $\text{KMnO}_4$  reaction, and (b) with ethidium bromide after 20 min. reaction with  $\text{KMnO}_4$ . Ions containing oxidized thymines are labeled with ▼, with the number in parenthesis indicating the number of oxidation adducts. The single strand d(GTAGAGTCGACCTG) is abbreviated as ss1 and d(CAGGTCGACTCTAC) is ss2.

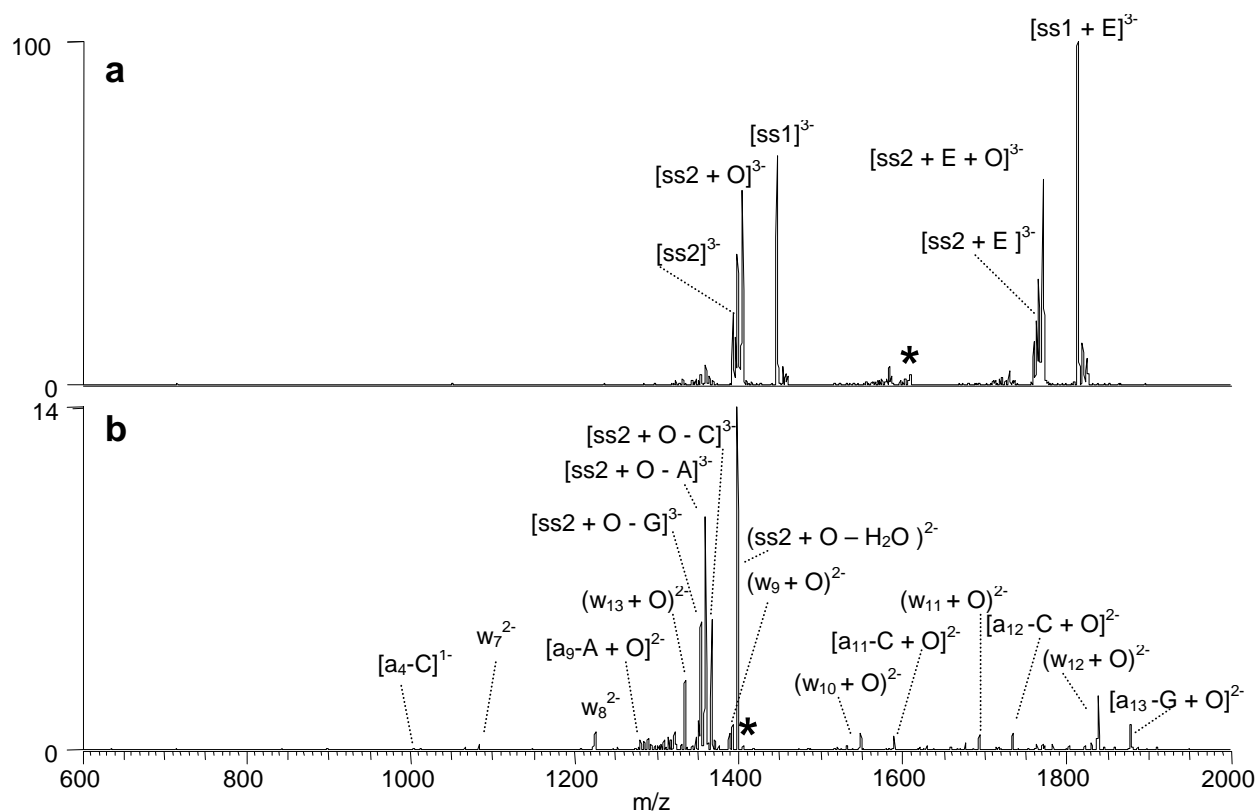

**Figure S-5.** ESI-MS<sup>3</sup> experiments for  $[\text{ds} + \text{E} + \text{O}]^{6-}$  containing  $\text{d}(\text{GCGGATATATGGCG}/\text{CGCCATATATCCGC})$  and echinomycin (E): (a) CAD spectrum of the initial  $[\text{ds} + \text{E} + \text{O}]^{6-}$  complex and (b) MS<sup>3</sup> spectrum of the  $[\text{ss}2 + \text{O}]^{3-}$  product ion. “O” is indicative of an oxidation adduct. The sequence structure in Figure 5b summarizes the sequence coverage. The fragments containing an oxidation adduct are labeled with a “▼” symbol. The thymine that was determined to be oxidized is underlined in the sequence shown in Figure 2b.
